# Supplementary material
Source: publisher figshare collection journal article supplement (https://acs.figshare.com/ndownloader/files/4457836)
Supplement: Supplementary file 1 [file 4457836]

 
data_0463sejk
_ccdc_journal_manuscript_code    jo-2010-00362n
_publ_requested_journal          J.Org.Chem.
_publ_contact_author_name        'Herwig BERTHOLD'
_publ_contact_author_address     
;University of Hamburg
Department of Chemistry
Martin-Luther-King-Platz 6
20146 Hamburg
Germany
;
_publ_contact_author_email       berthold@chemie.uni-hamburg.de
_publ_contact_author_phone       49(40)34832205
_publ_contact_author_fax         49(40)42838x4325
loop_
_publ_author_name
_publ_author_address
'Berthold, Herwig Josef'
;University of Hamburg
Department of Chemistry
Martin-Luther-King-Platz 6
20146 Hamburg
Germany
;
'Thiem, Joachim'
;Department of Chemistry
University of Hamburg
Martin-Luther-King-Platz 6
20146 Hamburg
Germany
;
'Schotten, Theo'
;CAN GmbH
Grindelallee 117
20146 Hamburg
Germany
;
'Hoffmann, Frank'
;University of Hamburg
Department of Chemistry
Martin-Luther-King-Platz 6
20146 Hamburg
Germany
;
'Franke, Stephan'
;University of Hamburg
Department of Chemistry
Martin-Luther-King-Platz 6
20146 Hamburg
Germany
;

_audit_update_record             
;
2010-04-14 # Formatted by publCIF
;

_audit_creation_method           SHELXL-97
_chemical_name_systematic        
'2,3,4,6-tetra-<i>O</i>-acetyl-<i>\b</i>-D-glucopyranosyl azide'
_chemical_name_common            
2,3,4,6-tetra-<i>O</i>-acetyl-<i>\b</i>-D-glucopyranosyl_azide
_chemical_formula_moiety         'C14 H19 N3 O9'
_chemical_formula_sum            'C14 H19 N3 O9'
_exptl_crystal_recrystallization_method 'ethyl acetate / diethyl ether'
_chemical_melting_point          400

_exptl_crystal_description       block
_exptl_crystal_colour            grayish_colourless

_diffrn_ambient_temperature      153(2)
_chemical_formula_weight         373.32

loop_
_atom_type_symbol
_atom_type_description
_atom_type_scat_dispersion_real
_atom_type_scat_dispersion_imag
_atom_type_scat_source
C C 0.0033 0.0000 'International Tables Vol C Tables 4.2.6.8 and 6.1.1.4'
H H 0.0000 0.0000 'International Tables Vol C Tables 4.2.6.8 and 6.1.1.4'
N N 0.0061 0.0000 'International Tables Vol C Tables 4.2.6.8 and 6.1.1.4'
O O 0.0106 0.0000 'International Tables Vol C Tables 4.2.6.8 and 6.1.1.4'

_symmetry_cell_setting           orthorhombic
_symmetry_space_group_name_H-M   'P 21 21 21'
_symmetry_int_tables_number      19
_chemical_absolute_configuration ad
_symmetry_space_group_name_Hall  'P 2ac 2ab'

loop_
_symmetry_equiv_pos_as_xyz
'x, y, z'
'-x+1/2, -y, z+1/2'
'x+1/2, -y+1/2, -z'
'-x, y+1/2, -z+1/2'

_cell_length_a                   7.3509(4)
_cell_length_b                   14.7643(7)
_cell_length_c                   15.9289(8)
_cell_angle_alpha                90.00
_cell_angle_beta                 90.00
_cell_angle_gamma                90.00
_cell_volume                     1728.78(15)
_cell_formula_units_Z            4
_cell_measurement_temperature    153(2)
_cell_measurement_reflns_used    412
_cell_measurement_theta_min      1.2
_cell_measurement_theta_max      27.0
_exptl_crystal_size_max          0.43
_exptl_crystal_size_mid          0.33
_exptl_crystal_size_min          0.24
_exptl_crystal_density_meas      ?
_exptl_crystal_density_diffrn    1.434
_exptl_crystal_density_method    'not measured'
_exptl_crystal_F_000             784
_exptl_absorpt_coefficient_mu    0.121
_exptl_absorpt_correction_type   multi-scan
_exptl_absorpt_correction_T_min  0.9497
_exptl_absorpt_correction_T_max  0.9715
_exptl_absorpt_process_details   'SADABS (Bruker AXS, 1998)'

_exptl_special_details           
; 
 ? 
;
_diffrn_radiation_probe          ?
_diffrn_radiation_type           MoK\a
_diffrn_radiation_wavelength     0.71073
_diffrn_source                   'fine-focus sealed tube'
_diffrn_radiation_monochromator  graphite
_diffrn_measurement_device_type  'Bruker Smart APEX CCD area detector'
_diffrn_measurement_method       omega-scan
_diffrn_detector_area_resol_mean ?
_diffrn_standards_number         none
_diffrn_standards_interval_count none
_diffrn_standards_interval_time  none
_diffrn_standards_decay_%        0
_diffrn_reflns_number            47253
_diffrn_reflns_av_R_equivalents  0.0352
_diffrn_reflns_av_sigmaI/netI    0.0192
_diffrn_reflns_limit_h_min       -11
_diffrn_reflns_limit_h_max       11
_diffrn_reflns_limit_k_min       -22
_diffrn_reflns_limit_k_max       22
_diffrn_reflns_limit_l_min       -24
_diffrn_reflns_limit_l_max       23
_diffrn_reflns_theta_min         1.88
_diffrn_reflns_theta_max         32.50
_reflns_number_total             3527
_reflns_number_gt                3195
_reflns_threshold_expression     >2sigma(I)

_computing_data_collection       'SMART (Bruker AXS, 1998)'
_computing_cell_refinement       'SAINT (Bruker AXS, 1998)'
_computing_data_reduction        'SAINT (Bruker AXS, 1998)'
_computing_structure_solution    'SHELXS-97 (Sheldrick, 1990)'
_computing_structure_refinement  'SHELXL-97 (Sheldrick, 1997)'
_computing_molecular_graphics    ?
_computing_publication_material  ?

_refine_special_details          
; 
 Refinement of F^2^ against ALL reflections.  The weighted R-factor wR and 
 goodness of fit S are based on F^2^, conventional R-factors R are based 
 on F, with F set to zero for negative F^2^. The threshold expression of 
 F^2^ > 2sigma(F^2^) is used only for calculating R-factors(gt) etc. and is 
 not relevant to the choice of reflections for refinement.  R-factors based 
 on F^2^ are statistically about twice as large as those based on F, and R- 
 factors based on ALL data will be even larger. 
;

_refine_ls_structure_factor_coef Fsqd
_refine_ls_matrix_type           full
_refine_ls_weighting_scheme      calc
_refine_ls_weighting_details     
'calc w=1/[\s^2^(Fo^2^)+(0.0646P)^2^+0.0913P] where P=(Fo^2^+2Fc^2^)/3'
_atom_sites_solution_primary     direct
_atom_sites_solution_secondary   difmap
_atom_sites_solution_hydrogens   geom
_refine_ls_hydrogen_treatment    riding
_refine_ls_extinction_method     none
_refine_ls_extinction_coef       ?
_refine_ls_abs_structure_details 'Flack H D (1983), Acta Cryst. A39, 876-881'
_refine_ls_abs_structure_Flack   0(10)
_refine_ls_number_reflns         3527
_refine_ls_number_parameters     239
_refine_ls_number_restraints     0
_refine_ls_R_factor_all          0.0420
_refine_ls_R_factor_gt           0.0387
_refine_ls_wR_factor_ref         0.0953
_refine_ls_wR_factor_gt          0.0938
_refine_ls_goodness_of_fit_ref   0.991
_refine_ls_restrained_S_all      0.991
_refine_ls_shift/su_max          0.027
_refine_ls_shift/su_mean         0.001

loop_
_atom_site_label
_atom_site_type_symbol
_atom_site_fract_x
_atom_site_fract_y
_atom_site_fract_z
_atom_site_U_iso_or_equiv
_atom_site_adp_type
_atom_site_occupancy
_atom_site_symmetry_multiplicity
_atom_site_calc_flag
_atom_site_refinement_flags
_atom_site_disorder_assembly
_atom_site_disorder_group
O41 O 0.29141(12) 0.42963(7) -0.03703(6) 0.02041(18) Uani 1 1 d . . .
O5 O 0.65249(13) 0.52370(6) 0.09103(6) 0.01983(18) Uani 1 1 d . . .
O61 O 0.47745(14) 0.63721(6) -0.03069(6) 0.02345(19) Uani 1 1 d . . .
O21 O 0.57287(14) 0.31839(6) 0.21318(6) 0.0232(2) Uani 1 1 d . . .
O31 O 0.23709(13) 0.34297(6) 0.12997(6) 0.02163(19) Uani 1 1 d . . .
O32 O 0.23348(17) 0.22830(8) 0.03616(7) 0.0355(3) Uani 1 1 d . . .
O42 O 0.02117(16) 0.47832(10) 0.01215(8) 0.0401(3) Uani 1 1 d . . .
O22 O 0.4607(2) 0.36350(8) 0.33815(7) 0.0458(3) Uani 1 1 d . . .
O62 O 0.5333(2) 0.69032(10) -0.15930(8) 0.0506(4) Uani 1 1 d . . .
N11 N 0.77895(17) 0.48975(9) 0.22119(7) 0.0274(3) Uani 1 1 d . . .
N12 N 0.94400(18) 0.50733(9) 0.21343(8) 0.0294(3) Uani 1 1 d . . .
N13 N 1.0913(2) 0.52643(13) 0.21661(11) 0.0470(4) Uani 1 1 d . . .
C5 C 0.57290(17) 0.48915(8) 0.01539(8) 0.0179(2) Uani 1 1 d . . .
H5 H 0.6447 0.4350 -0.0027 0.021 Uiso 1 1 calc R . .
C31 C 0.16806(19) 0.26591(9) 0.09638(8) 0.0224(2) Uani 1 1 d . . .
C3 C 0.40726(18) 0.37601(8) 0.09687(8) 0.0186(2) Uani 1 1 d . . .
H3 H 0.4693 0.3263 0.0653 0.022 Uiso 1 1 calc R . .
C2 C 0.52216(18) 0.40201(8) 0.17284(8) 0.0195(2) Uani 1 1 d . . .
H2 H 0.4502 0.4408 0.2122 0.023 Uiso 1 1 calc R . .
C6 C 0.58421(19) 0.55895(8) -0.05303(8) 0.0211(2) Uani 1 1 d . . .
H6A H 0.7126 0.5770 -0.0615 0.025 Uiso 1 1 calc R . .
H6B H 0.5383 0.5330 -0.1063 0.025 Uiso 1 1 calc R . .
C1 C 0.69611(17) 0.45086(8) 0.14596(8) 0.0203(2) Uani 1 1 d . . .
H1 H 0.7819 0.4077 0.1181 0.024 Uiso 1 1 calc R . .
C41 C 0.10949(18) 0.44539(10) -0.04319(9) 0.0242(3) Uani 1 1 d . . .
C4 C 0.38124(16) 0.45732(8) 0.03889(7) 0.0175(2) Uani 1 1 d . . .
H4 H 0.3118 0.5066 0.0677 0.021 Uiso 1 1 calc R . .
C42 C 0.0411(2) 0.41498(11) -0.12673(9) 0.0297(3) Uani 1 1 d . . .
H42A H 0.0513 0.3489 -0.1308 0.044 Uiso 1 1 calc R . .
H42B H 0.1138 0.4432 -0.1712 0.044 Uiso 1 1 calc R . .
H42C H -0.0865 0.4328 -0.1331 0.044 Uiso 1 1 calc R . .
C61 C 0.4665(2) 0.70063(11) -0.09171(10) 0.0297(3) Uani 1 1 d . . .
C32 C 0.0038(2) 0.23483(11) 0.14321(10) 0.0320(3) Uani 1 1 d . . .
H32A H -0.1043 0.2426 0.1079 0.048 Uiso 1 1 calc R . .
H32B H -0.0097 0.2707 0.1946 0.048 Uiso 1 1 calc R . .
H32C H 0.0175 0.1707 0.1579 0.048 Uiso 1 1 calc R . .
C21 C 0.5295(2) 0.30641(10) 0.29565(8) 0.0278(3) Uani 1 1 d . . .
C22 C 0.5769(3) 0.21234(11) 0.32230(10) 0.0373(4) Uani 1 1 d . . .
H22A H 0.5833 0.2096 0.3837 0.056 Uiso 1 1 calc R . .
H22B H 0.6950 0.1954 0.2984 0.056 Uiso 1 1 calc R . .
H22C H 0.4834 0.1703 0.3022 0.056 Uiso 1 1 calc R . .
C62 C 0.3687(3) 0.78308(12) -0.06222(13) 0.0460(4) Uani 1 1 d . . .
H62A H 0.4449 0.8158 -0.0218 0.069 Uiso 1 1 calc R . .
H62B H 0.2544 0.7653 -0.0352 0.069 Uiso 1 1 calc R . .
H62C H 0.3424 0.8224 -0.1103 0.069 Uiso 1 1 calc R . .

loop_
_atom_site_aniso_label
_atom_site_aniso_U_11
_atom_site_aniso_U_22
_atom_site_aniso_U_33
_atom_site_aniso_U_23
_atom_site_aniso_U_13
_atom_site_aniso_U_12
O41 0.0204(4) 0.0235(4) 0.0173(4) -0.0033(3) -0.0017(3) 0.0020(3)
O5 0.0244(4) 0.0154(4) 0.0197(4) 0.0004(3) -0.0018(4) -0.0021(3)
O61 0.0298(5) 0.0197(4) 0.0208(4) 0.0028(3) 0.0039(4) 0.0059(4)
O21 0.0314(5) 0.0204(4) 0.0179(4) 0.0038(3) 0.0006(4) 0.0002(4)
O31 0.0239(4) 0.0198(4) 0.0212(4) -0.0030(3) 0.0030(4) -0.0058(3)
O32 0.0390(6) 0.0321(5) 0.0354(5) -0.0153(5) 0.0088(5) -0.0122(5)
O42 0.0245(5) 0.0625(8) 0.0333(6) -0.0104(6) 0.0027(5) 0.0076(5)
O22 0.0786(10) 0.0331(6) 0.0257(5) 0.0004(5) 0.0142(6) 0.0040(7)
O62 0.0679(9) 0.0506(7) 0.0332(6) 0.0208(6) 0.0148(6) 0.0174(7)
N11 0.0270(6) 0.0341(6) 0.0212(5) -0.0028(5) -0.0028(5) -0.0067(5)
N12 0.0305(6) 0.0310(6) 0.0268(6) -0.0053(5) -0.0032(5) -0.0023(5)
N13 0.0303(7) 0.0640(11) 0.0466(9) -0.0203(8) -0.0018(7) -0.0109(7)
C5 0.0199(5) 0.0164(5) 0.0173(5) -0.0008(4) 0.0018(4) -0.0003(4)
C31 0.0259(6) 0.0195(5) 0.0217(5) -0.0007(5) -0.0024(5) -0.0042(5)
C3 0.0203(5) 0.0178(5) 0.0177(5) -0.0009(4) 0.0014(4) -0.0023(4)
C2 0.0237(5) 0.0170(5) 0.0177(5) 0.0007(4) -0.0005(5) -0.0015(4)
C6 0.0260(6) 0.0185(5) 0.0187(5) 0.0008(4) 0.0046(5) 0.0024(5)
C1 0.0228(5) 0.0184(5) 0.0198(5) 0.0002(4) -0.0022(5) -0.0013(5)
C41 0.0210(6) 0.0278(6) 0.0240(6) 0.0016(5) -0.0015(5) -0.0003(5)
C4 0.0193(5) 0.0175(5) 0.0157(5) -0.0009(4) 0.0007(4) -0.0002(4)
C42 0.0281(6) 0.0352(7) 0.0257(6) 0.0002(6) -0.0065(6) -0.0015(6)
C61 0.0304(7) 0.0285(7) 0.0301(7) 0.0108(5) 0.0010(6) 0.0042(6)
C32 0.0330(7) 0.0317(7) 0.0314(7) -0.0043(6) 0.0054(6) -0.0137(6)
C21 0.0391(7) 0.0257(6) 0.0185(5) 0.0020(5) 0.0006(6) -0.0069(6)
C22 0.0590(10) 0.0287(7) 0.0241(6) 0.0086(6) 0.0016(7) -0.0013(8)
C62 0.0521(11) 0.0312(8) 0.0548(11) 0.0115(8) 0.0033(9) 0.0183(8)

_geom_special_details            
; 
 All esds (except the esd in the dihedral angle between two l.s. planes) 
 are estimated using the full covariance matrix.  The cell esds are taken 
 into account individually in the estimation of esds in distances, angles 
 and torsion angles; correlations between esds in cell parameters are only 
 used when they are defined by crystal symmetry.  An approximate (isotropic) 
 treatment of cell esds is used for estimating esds involving l.s. planes. 
;

loop_
_geom_bond_atom_site_label_1
_geom_bond_atom_site_label_2
_geom_bond_distance
_geom_bond_site_symmetry_2
_geom_bond_publ_flag
O41 C41 1.3609(16) . ?
O41 C4 1.4372(15) . ?
O5 C1 1.4230(15) . ?
O5 C5 1.4332(15) . ?
O61 C61 1.3519(16) . ?
O61 C6 1.4414(16) . ?
O21 C21 1.3634(16) . ?
O21 C2 1.4408(15) . ?
O31 C31 1.3559(15) . ?
O31 C3 1.4424(15) . ?
O32 C31 1.2082(17) . ?
O42 C41 1.1979(18) . ?
O22 C21 1.193(2) . ?
O62 C61 1.193(2) . ?
N11 N12 1.2469(18) . ?
N11 C1 1.4617(17) . ?
N12 N13 1.120(2) . ?
C5 C6 1.5022(17) . ?
C5 C4 1.5316(17) . ?
C5 H5 1.0000 . ?
C31 C32 1.492(2) . ?
C3 C2 1.5248(17) . ?
C3 C4 1.5268(17) . ?
C3 H3 1.0000 . ?
C2 C1 1.5293(18) . ?
C2 H2 1.0000 . ?
C6 H6A 0.9900 . ?
C6 H6B 0.9900 . ?
C1 H1 1.0000 . ?
C41 C42 1.492(2) . ?
C4 H4 1.0000 . ?
C42 H42A 0.9800 . ?
C42 H42B 0.9800 . ?
C42 H42C 0.9800 . ?
C61 C62 1.490(2) . ?
C32 H32A 0.9800 . ?
C32 H32B 0.9800 . ?
C32 H32C 0.9800 . ?
C21 C22 1.494(2) . ?
C22 H22A 0.9800 . ?
C22 H22B 0.9800 . ?
C22 H22C 0.9800 . ?
C62 H62A 0.9800 . ?
C62 H62B 0.9800 . ?
C62 H62C 0.9800 . ?

loop_
_geom_angle_atom_site_label_1
_geom_angle_atom_site_label_2
_geom_angle_atom_site_label_3
_geom_angle
_geom_angle_site_symmetry_1
_geom_angle_site_symmetry_3
_geom_angle_publ_flag
C41 O41 C4 117.61(10) . . ?
C1 O5 C5 109.87(9) . . ?
C61 O61 C6 114.22(10) . . ?
C21 O21 C2 118.70(11) . . ?
C31 O31 C3 117.65(10) . . ?
N12 N11 C1 113.95(12) . . ?
N13 N12 N11 171.34(16) . . ?
O5 C5 C6 110.07(10) . . ?
O5 C5 C4 106.22(9) . . ?
C6 C5 C4 116.02(11) . . ?
O5 C5 H5 108.1 . . ?
C6 C5 H5 108.1 . . ?
C4 C5 H5 108.1 . . ?
O32 C31 O31 123.37(13) . . ?
O32 C31 C32 125.30(13) . . ?
O31 C31 C32 111.33(12) . . ?
O31 C3 C2 105.99(10) . . ?
O31 C3 C4 112.23(10) . . ?
C2 C3 C4 110.58(10) . . ?
O31 C3 H3 109.3 . . ?
C2 C3 H3 109.3 . . ?
C4 C3 H3 109.3 . . ?
O21 C2 C3 106.35(9) . . ?
O21 C2 C1 108.22(10) . . ?
C3 C2 C1 111.08(10) . . ?
O21 C2 H2 110.4 . . ?
C3 C2 H2 110.4 . . ?
C1 C2 H2 110.4 . . ?
O61 C6 C5 109.92(10) . . ?
O61 C6 H6A 109.7 . . ?
C5 C6 H6A 109.7 . . ?
O61 C6 H6B 109.7 . . ?
C5 C6 H6B 109.7 . . ?
H6A C6 H6B 108.2 . . ?
O5 C1 N11 107.53(10) . . ?
O5 C1 C2 109.89(10) . . ?
N11 C1 C2 107.70(10) . . ?
O5 C1 H1 110.5 . . ?
N11 C1 H1 110.5 . . ?
C2 C1 H1 110.5 . . ?
O42 C41 O41 123.29(13) . . ?
O42 C41 C42 126.59(13) . . ?
O41 C41 C42 110.11(12) . . ?
O41 C4 C3 110.06(10) . . ?
O41 C4 C5 107.71(9) . . ?
C3 C4 C5 105.90(10) . . ?
O41 C4 H4 111.0 . . ?
C3 C4 H4 111.0 . . ?
C5 C4 H4 111.0 . . ?
C41 C42 H42A 109.5 . . ?
C41 C42 H42B 109.5 . . ?
H42A C42 H42B 109.5 . . ?
C41 C42 H42C 109.5 . . ?
H42A C42 H42C 109.5 . . ?
H42B C42 H42C 109.5 . . ?
O62 C61 O61 122.40(14) . . ?
O62 C61 C62 125.97(15) . . ?
O61 C61 C62 111.59(14) . . ?
C31 C32 H32A 109.5 . . ?
C31 C32 H32B 109.5 . . ?
H32A C32 H32B 109.5 . . ?
C31 C32 H32C 109.5 . . ?
H32A C32 H32C 109.5 . . ?
H32B C32 H32C 109.5 . . ?
O22 C21 O21 123.66(14) . . ?
O22 C21 C22 126.47(14) . . ?
O21 C21 C22 109.86(13) . . ?
C21 C22 H22A 109.5 . . ?
C21 C22 H22B 109.5 . . ?
H22A C22 H22B 109.5 . . ?
C21 C22 H22C 109.5 . . ?
H22A C22 H22C 109.5 . . ?
H22B C22 H22C 109.5 . . ?
C61 C62 H62A 109.5 . . ?
C61 C62 H62B 109.5 . . ?
H62A C62 H62B 109.5 . . ?
C61 C62 H62C 109.5 . . ?
H62A C62 H62C 109.5 . . ?
H62B C62 H62C 109.5 . . ?

loop_
_geom_torsion_atom_site_label_1
_geom_torsion_atom_site_label_2
_geom_torsion_atom_site_label_3
_geom_torsion_atom_site_label_4
_geom_torsion
_geom_torsion_site_symmetry_1
_geom_torsion_site_symmetry_2
_geom_torsion_site_symmetry_3
_geom_torsion_site_symmetry_4
_geom_torsion_publ_flag
C1 N11 N12 N13 -178(100) . . . . ?
C1 O5 C5 C6 -161.04(10) . . . . ?
C1 O5 C5 C4 72.61(12) . . . . ?
C3 O31 C31 O32 -6.36(19) . . . . ?
C3 O31 C31 C32 173.62(11) . . . . ?
C31 O31 C3 C2 -135.17(11) . . . . ?
C31 O31 C3 C4 104.02(12) . . . . ?
C21 O21 C2 C3 -123.71(12) . . . . ?
C21 O21 C2 C1 116.87(13) . . . . ?
O31 C3 C2 O21 70.64(12) . . . . ?
C4 C3 C2 O21 -167.49(10) . . . . ?
O31 C3 C2 C1 -171.83(10) . . . . ?
C4 C3 C2 C1 -49.96(13) . . . . ?
C61 O61 C6 C5 -174.58(12) . . . . ?
O5 C5 C6 O61 -63.97(14) . . . . ?
C4 C5 C6 O61 56.64(14) . . . . ?
C5 O5 C1 N11 179.17(10) . . . . ?
C5 O5 C1 C2 -63.87(12) . . . . ?
N12 N11 C1 O5 -82.00(15) . . . . ?
N12 N11 C1 C2 159.61(12) . . . . ?
O21 C2 C1 O5 168.00(9) . . . . ?
C3 C2 C1 O5 51.61(13) . . . . ?
O21 C2 C1 N11 -75.15(12) . . . . ?
C3 C2 C1 N11 168.46(11) . . . . ?
C4 O41 C41 O42 -2.3(2) . . . . ?
C4 O41 C41 C42 178.27(11) . . . . ?
C41 O41 C4 C3 99.83(13) . . . . ?
C41 O41 C4 C5 -145.16(11) . . . . ?
O31 C3 C4 O41 -68.63(12) . . . . ?
C2 C3 C4 O41 173.25(10) . . . . ?
O31 C3 C4 C5 175.22(9) . . . . ?
C2 C3 C4 C5 57.10(12) . . . . ?
O5 C5 C4 O41 174.97(9) . . . . ?
C6 C5 C4 O41 52.31(13) . . . . ?
O5 C5 C4 C3 -67.30(11) . . . . ?
C6 C5 C4 C3 170.04(10) . . . . ?
C6 O61 C61 O62 3.1(2) . . . . ?
C6 O61 C61 C62 -174.93(14) . . . . ?
C2 O21 C21 O22 -4.5(2) . . . . ?
C2 O21 C21 C22 174.21(12) . . . . ?

_diffrn_measured_fraction_theta_max 1.000
_diffrn_reflns_theta_full        32.50
_diffrn_measured_fraction_theta_full 1.000
_refine_diff_density_max         0.385
_refine_diff_density_min         -0.179
_refine_diff_density_rms         0.057
